# Supplementary material
Source: PubMed Central journal article supplement (PMC7254932)
Supplement: NIHMS1559096-supplement-Supplements.pdf [file NIHMS1559096-supplement-Supplements.pdf]

# The emerging role of epigenetic therapeutics in immuno-oncology

---

*Michael J. Topper, Michelle Vaz, Kristen A. Marrone, Julie R. Brahmer and Stephen B. Baylin*

<https://doi.org/10.1038/s41571-019-0266-5>

Supplementary Table S1 | Ongoing clinical trials of combined epigenetic therapy and immune-checkpoint inhibition

| ClinicalTrials.gov identifier (study name) | Cancer type                                                                                                                                                          | Epigenetic agent          | Immune-checkpoint inhibitor                                                                                           | Study Phase |
|--------------------------------------------|----------------------------------------------------------------------------------------------------------------------------------------------------------------------|---------------------------|-----------------------------------------------------------------------------------------------------------------------|-------------|
| <b>Combinations with DNMTi</b>             |                                                                                                                                                                      |                           |                                                                                                                       |             |
| NCT03264404                                | Advanced-stage PDAC                                                                                                                                                  | Azacitidine               | Pembrolizumab (anti-PD-1 antibody)                                                                                    | Phase II    |
| NCT02260440                                | Refractory metastatic CRC                                                                                                                                            | Azacitidine               | Pembrolizumab                                                                                                         | Phase II    |
| NCT03769532 (PEMAZA)                       | <i>NPM1</i> -mutated AML                                                                                                                                             | Azacitidine               | Pembrolizumab                                                                                                         | Phase II    |
| NCT02845297                                | R/R AML or newly diagnosed AML (in patients aged $\geq 65$ years)                                                                                                    | Azacitadine               | Pembrolizumab                                                                                                         | Phase II    |
| NCT03094637                                | MDS                                                                                                                                                                  | Azacitidine               | Pembrolizumab                                                                                                         | Phase II    |
| NCT02397720                                | AML                                                                                                                                                                  | Azacitidine               | Nivolumab (anti-PD-1 antibody) $\pm$ ipilimumab (anti-CTLA-4 antibody)                                                | Phase II    |
| NCT02530463                                | MDS                                                                                                                                                                  | Azacitidine               | Nivolumab and/or ipilimumab                                                                                           | Phase II    |
| NCT02775903                                | Newly diagnosed high-Risk MDS or AML (in patients aged $\geq 65$ years)                                                                                              | Azacitidine               | Durvalumab (anti-PD-L1 antibody)                                                                                      | Phase II    |
| NCT02951156 (Javelin DLBCL)                | R/R DLBCL                                                                                                                                                            | Azacitidine               | Avelumab (anti-PD-L1 antibody) + utomilumab (anti-4-1BB agonistic antibody) $\pm$ rituximab and bendamustine          | Phase I/III |
| NCT02959437 (ECHO-206)                     | Advanced-stage solid tumours, including previously treated stage IIIB or stage IV NSCLC or stage IV MSS CRC                                                          | Azacitidine               | Pembrolizumab + epacadostat (IDO1 inhibitor)                                                                          | Phase I/II  |
| NCT03628209                                | Resectable recurrent osteosarcoma                                                                                                                                    | Azacitidine               | Nivolumab                                                                                                             | Phase I/II  |
| NCT03825367                                | Paediatric R/R AML                                                                                                                                                   | Azacitidine               | Nivolumab                                                                                                             | Phase I/II  |
| NCT03161223                                | R/R PTCL                                                                                                                                                             | Azacitidine               | Durvalumab ( $\pm$ romidepsin)                                                                                        | Phase I/II  |
| NCT03019003                                | Recurrent and/or metastatic HNSCC previously treated with immune-checkpoint inhibition                                                                               | Azacitidine               | Durvalumab + tremelimumab (anti-CTLA-4 antibody)                                                                      | Phase I/II  |
| NCT03699384                                | AML with minimal residual disease (detectable at any level by multiparameter flow cytometry of a bone marrow aspirate)                                               | Azacitidine               | Avelumab                                                                                                              | Phase I/II  |
| NCT02953561                                | R/R AML, including AML arising from previous MDS, CMML or myeloproliferative neoplasm                                                                                | Azacitidine               | Avelumab                                                                                                              | Phase I/II  |
| NCT03390296                                | AML                                                                                                                                                                  | Azacitadine               | Avelumab (+ gemtuzumab ozogamicin or venetoclax), or avelumab + PF-04518600 (anti-OX40 agonistic monoclonal antibody) | Phase I/II  |
| NCT02117219                                | MDS                                                                                                                                                                  | Azacitidine               | Durvalumab $\pm$ tremelimumab                                                                                         | Phase I     |
| NCT02546986                                | Advanced-stage NSCLC (previously treated)                                                                                                                            | CC-486 (oral azacitidine) | Pembrolizumab                                                                                                         | Phase II    |
| NCT02816021                                | Advanced-stage melanoma with or without prior PD-1 treatment                                                                                                         | CC-486                    | Pembrolizumab                                                                                                         | Phase II    |
| NCT02900560                                | Platinum-resistant and/or platinum refractory epithelial ovarian, fallopian tube or primary peritoneal cancer                                                        | CC-486                    | Pembrolizumab                                                                                                         | Phase II    |
| NCT02811497 (METADUR)                      | Advanced-stage solid tumours, including MSS CRC, platinum-resistant epithelial ovarian cancer type II or oestrogen receptor-positive and HER2-negative breast cancer | CC-486                    | Durvalumab                                                                                                            | Phase II    |
| NCT02512172                                | Advanced-stage MSS CRC                                                                                                                                               | CC-486                    | Pembrolizumab                                                                                                         | Phase I     |
| NCT02957968                                | HER2-negative, hormone receptor-positive or triple-negative locally advanced breast cancer                                                                           | Decitabine                | Pembrolizumab (prior to standard neoadjuvant therapy)                                                                 | Phase II    |
| NCT03250962                                | R/R Hodgkin lymphoma                                                                                                                                                 | Decitabine                | Camrelizumab (SHR-1210;                                                                                               | Phase II    |

|                                |                                                                                                            |                                                                              |                                                                                                                          |                       |
|--------------------------------|------------------------------------------------------------------------------------------------------------|------------------------------------------------------------------------------|--------------------------------------------------------------------------------------------------------------------------|-----------------------|
|                                |                                                                                                            |                                                                              | anti-PD-1 antibody)                                                                                                      |                       |
| NCT02996474                    | R/R AML                                                                                                    | Decitabine                                                                   | Pembrolizumab                                                                                                            | Phase I/II            |
| NCT03346642                    | PMBCL                                                                                                      | Decitabine                                                                   | Camrelizumab (+ gemcitabine, vinorelbine and doxorubicin chemotherapy)                                                   |                       |
| NCT03969446                    | MDS or AML                                                                                                 | Decitabine                                                                   | Pembrolizumab                                                                                                            | Phase I               |
| NCT03240211                    | PTCL or CTCL                                                                                               | Decitabine                                                                   | Pembrolizumab (± pralatrexate)                                                                                           | Phase I               |
| NCT03445858                    | R/R non-primary CNS solid tumours or lymphomas (in paediatric or young adult patients)                     | Decitabine                                                                   | Pembrolizumab + hypofractionated index site radiation                                                                    | Early phase I (pilot) |
| NCT02890329                    | R/R MDS or AML                                                                                             | Decitabine                                                                   | Ipilimumab                                                                                                               | Phase I               |
| NCT03395873                    | AML (in patients who are unfit for first-line intensive chemotherapy)                                      | Decitabine                                                                   | Avelumab                                                                                                                 | Phase I               |
| NCT03358719                    | MDS or AML                                                                                                 | Decitabine                                                                   | Nivolumab, poly ICLC and CDX-1401 (anti-DEC-205 antibody–NY-ESO-1 fusion protein, which is a DC-targeted cancer vaccine) | Phase I               |
| NCT03066648                    | High-risk MDS or AML                                                                                       | Decitabine                                                                   | Spartalizumab (anti-PD-1 antibody) and/or MBG453 (anti-TIM3 antibody)                                                    | Phase I               |
| NCT02664181 (PRECISE)          | Advanced-stage NSCLC (second line)                                                                         | Tetrahydrouridine (cytidine deaminase inhibitor) + oral decitabine (THU-DAC) | Nivolumab                                                                                                                | Phase II              |
| NCT03233724                    | Advanced-stage NSCLC (first line)                                                                          | THU-DAC                                                                      | Pembrolizumab                                                                                                            | Phase I/II            |
| NCT02901899                    | Recurrent, platinum-resistant epithelial ovarian, fallopian tube or primary peritoneal cancer              | Guadecitabine                                                                | Pembrolizumab                                                                                                            | Phase II              |
| NCT03179943                    | Recurrent and/or metastatic urothelial carcinoma that is R/R to PD-1 or PD-L1 immune-checkpoint inhibition | Guadecitabine                                                                | Atezolizumab (anti-PD-L1 antibody)                                                                                       | Phase II              |
| NCT03576963                    | Refractory metastatic CRC                                                                                  | Guadecitabine                                                                | Nivolumab                                                                                                                | Phase I/II            |
| NCT03308396                    | Advanced-stage clear cell RCC                                                                              | Guadecitabine                                                                | Durvalumab                                                                                                               | phase I/II            |
| NCT02935361                    | Advanced-stage MDS or R/R CMML                                                                             | Guadecitabine                                                                | Atezolizumab                                                                                                             | Phase I/II            |
| NCT02998567 (HyPeR)            | Advanced-stage CRPC, NSCLC or other solid tumours                                                          | Guadecitabine                                                                | Pembrolizumab                                                                                                            | Phase I               |
| NCT03257761                    | Advanced-stage hepatocellular carcinoma, cholangiocarcinoma, gallbladder cancer or PDAC                    | Guadecitabine                                                                | Durvalumab                                                                                                               | Phase I               |
| <b>Combinations with HDACi</b> |                                                                                                            |                                                                              |                                                                                                                          |                       |
| NCT03765229                    | Non-inflamed stage III–IV melanoma                                                                         | Entinostat                                                                   | Pembrolizumab                                                                                                            | Phase II              |
| NCT02697630 (PEMDAC)           | Metastatic uveal melanoma                                                                                  | Entinostat                                                                   | Pembrolizumab                                                                                                            | Phase II              |
| NCT03978624                    | Muscle-invasive bladder cancer                                                                             | Entinostat                                                                   | Pembrolizumab                                                                                                            | Phase II              |
| NCT03179930                    | R/R lymphomas                                                                                              | Entinostat                                                                   | Pembrolizumab                                                                                                            | Phase II              |
| NCT03250273                    | Previously treated advanced-stage cholangiocarcinoma or PDAC                                               | Entinostat                                                                   | Nivolumab                                                                                                                | Phase II              |
| NCT03552380                    | RCC previously treated with nivolumab + ipilimumab                                                         | Entinostat                                                                   | Nivolumab + ipilimumab                                                                                                   | Phase II              |
| NCT02437136                    | Advanced-stage NSCLC, melanoma or mismatch repair-proficient CRC                                           | Entinostat                                                                   | Pembrolizumab                                                                                                            | Phase Ib/II           |
| NCT02708680                    | Triple-negative breast cancer                                                                              | Entinostat                                                                   | Atezolizumab                                                                                                             | Phase Ib/II           |
| NCT02915523                    | Advanced-stage epithelial ovarian, peritoneal or fallopian tube cancer                                     | Entinostat                                                                   | Avelumab                                                                                                                 |                       |
| NCT03838042 (INFORM2 NivEnt)   | Children and adolescents with high-risk refractory malignancies                                            | Entinostat                                                                   | Nivolumab                                                                                                                | Phase I/II            |
| NCT03024437                    | Advanced-stage RCC                                                                                         | Entinostat                                                                   | Atezolizumab (+ bevacizumab)                                                                                             | Phase I/II            |
| NCT03280563                    | Advanced-stage hormone receptor-positive,                                                                  | Entinostat                                                                   | Atezolizumab (± fulvestrant                                                                                              | Phase I/II            |

|                                                     |                                                                                                             |                                                                 |                                                 |             |
|-----------------------------------------------------|-------------------------------------------------------------------------------------------------------------|-----------------------------------------------------------------|-------------------------------------------------|-------------|
| (MORPHEUS)                                          | HER2-negative breast cancer (after progression on CDK4/6 inhibitor)                                         |                                                                 | and ipatasertib)                                |             |
| NCT02909452                                         | Advanced-stage solid tumours                                                                                | Entinostat                                                      | Pembrolizumab                                   | Phase I     |
| NCT02936752                                         | MDS after failure of DNMTi therapy                                                                          | Entinostat                                                      | Pembrolizumab                                   | Phase I     |
| NCT02453620                                         | Advanced-stage solid tumours, including HER2-negative breast cancer                                         | Entinostat                                                      | Nivolumab + ipilimumab                          | Phase I     |
| NCT02395627                                         | Metastatic oestrogen receptor-positive, hormone therapy-resistant breast cancer                             | Vorinostat                                                      | Pembrolizumab (± tamoxifen)                     | Phase II    |
| NCT02638090                                         | Metastatic NSCLC                                                                                            | Vorinostat                                                      | Pembrolizumab                                   | Phase I/II  |
| NCT02538510                                         | Advanced-stage, recurrent HNSCC or salivary gland cancer                                                    | Vorinostat                                                      | Pembrolizumab                                   | Phase I/II  |
| NCT02619253                                         | Advanced prostate or urothelial carcinoma, or RCC                                                           | Vorinostat                                                      | Pembrolizumab                                   | Phase I/Ib  |
| NCT03426891                                         | Newly diagnosed glioblastoma                                                                                | Vorinostat                                                      | Pembrolizumab (+ temozolomide and radiotherapy) | Phase I     |
| NCT03150329                                         | R/R DLBCL, follicular lymphoma or Hodgkin lymphoma                                                          | Vorinostat                                                      | Pembrolizumab                                   | Phase I     |
| NCT02954991                                         | NSCLC                                                                                                       | Mocetinostat                                                    | Nivolumab                                       | Phase II    |
| NCT02805660                                         | Advanced-stage NSCLC or other solid tumours                                                                 | Mocetinostat                                                    | Durvalumab                                      | Phase I/II  |
| NCT03565406                                         | Advanced-stage melanoma                                                                                     | Mocetinostat                                                    | Nivolumab + ipilimumab                          | Phase Ib    |
| NCT03278782                                         | R/R PTCL                                                                                                    | Romidepsin                                                      | Pembrolizumab                                   | Phase I/II  |
| NCT02393794                                         | Triple-negative breast cancer                                                                               | Romidepsin                                                      | Nivolumab (+ cisplatin)                         | Phase I/II  |
| NCT03161223                                         | R/R PTCL                                                                                                    | Romidepsin                                                      | Durvalumab (± azacitidine or pralatrexate)      | Phase I/II  |
| NCT03357757 (LATENT)                                | Virus-associated cancers                                                                                    | Valproic Acid                                                   | Avelumab                                        | Phase II    |
| NCT02032810                                         | Advanced-stage melanoma                                                                                     | Panobinostat                                                    | Ipilimumab                                      | Phase I     |
| <b>Combinations with EZH2i</b>                      |                                                                                                             |                                                                 |                                                 |             |
| NCT03525795 (ORION-E)                               | Various advanced-stage solid tumours previously treated with a PD-1 or PD-L1 inhibitor                      | CPI-1205                                                        | Ipilimumab                                      | Phase I/II  |
| NCT03854474                                         | Advanced-stage urothelial carcinoma                                                                         | Tazemetostat                                                    | Pembrolizumab                                   | Phase I/II  |
| NCT02220842                                         | R/R follicular lymphoma or DLBCL                                                                            | Tazemetostat                                                    | Atezolizumab                                    | Phase I     |
| <b>Combinations with LSD1i</b>                      |                                                                                                             |                                                                 |                                                 |             |
| NCT02712905                                         | Advanced-stage SCLC that has previously progressed on platinum-based treatment                              | INCB059872                                                      | Pembrolizumab                                   | Phase I/II  |
| NCT02959437 (ECHO-206)                              | Advanced-stage solid tumours, including previously treated stage IIIB or stage IV NSCLC or stage IV MSS CRC | INCB059872 (LSD1i)                                              | Pembrolizumab + epacadostat (IDO1 inhibitor)    | Phase I/II  |
| NCT02712905                                         | Advanced-stage solid tumours or haematological malignancies                                                 | INCB059872 (plus azacitidine in those with treatment-naïve AML) | Nivolumab (in those with advanced-stage SCLC)   | Phase I/II  |
| <b>Combinations with BETi</b>                       |                                                                                                             |                                                                 |                                                 |             |
| NCT02959437 (ECHO-206)                              | Advanced-stage solid tumours, including previously treated stage IIIB or stage IV NSCLC or stage IV MSS CRC | INCB057643 (BETi)                                               | Pembrolizumab + epacadostat (IDO1 inhibitor)    | Phase I/II  |
| NCT02419417 (BET)                                   | Selected advanced-stage solid tumours or haematological malignancies                                        | BMS-986158 (BETi)                                               | Nivolumab                                       | Phase I/IIa |
| <b>Combinations with multiple epigenetic agents</b> |                                                                                                             |                                                                 |                                                 |             |
| NCT01928576                                         | Recurrent and/or metastatic NSCLC                                                                           | Azacitidine + entinostat                                        | Nivolumab                                       | Phase II    |
| NCT03161223                                         | R/R PTCL                                                                                                    | Azacitidine + romidepsin                                        | Durvalumab                                      | Phase I/II  |
| NCT03220477                                         | Advanced-stage NSCLC (that has progressed on treatment involving an anti-PD-1 or anti-PD-L1 antibody)       | Guadecitabine + mocetinostat                                    | Pembrolizumab                                   | Phase I     |

AML, acute myeloid leukaemia; BETi, bromodomain and extra-terminal motif protein inhibitor; CMML, chronic myelomonocytic leukaemia; CRC, colorectal cancer; CRPC, castration-resistant prostate cancer; CTCL, cutaneous T cell lymphoma; CTLA-4, cytotoxic T lymphocyte protein 4; DLBCL, diffuse large B cell lymphoma; DNMTi, DNA methyltransferase inhibitor; EZH2, enhancer of Zeste homologue 2; HDACi, histone deacetylase inhibitor; HNSCC,

head and neck squamous cell carcinoma; IDO1, indoleamine 2,3-dioxygenase 1; LSD1i, lysine-specific histone demethylase 1A (also known as KDM1A) inhibitor; MDS, myelodysplastic syndrome; MSS, microsatellite stable; NSCLC, non-small-cell lung cancer; NY-ESO-1, New York esophageal squamous cell carcinoma 1; PD-1, programmed cell death 1; PD-L1, programmed cell death 1 ligand 1; PDAC, pancreatic ductal adenocarcinoma; PMBCL, primary mediastinal large B cell lymphoma; PTCL, peripheral T cell lymphoma; RCC, renal cell carcinoma; R/R, relapsed and/or refractory; SCLC, small-cell lung cancer; TIM3, T cell immunoglobulin and mucin-domain containing 3 (also known as HAVCR2).
